# Supplementary material for: Social jetlag predicts greater evening energy intake in a UK cohort
Source: Research Square preprint supplement (doi:10.21203/rs.3.rs-6662028/v1), 2025-05-27
Supplement: Supplementary file 1 [file dae1e12d41599d2ea2de65fa.docx]

**Supplementary Data**

**Figure S1 & S2: Self-Reported Energy Intake Compared to Estimated Energy Requirements**

**S1**

**S2**
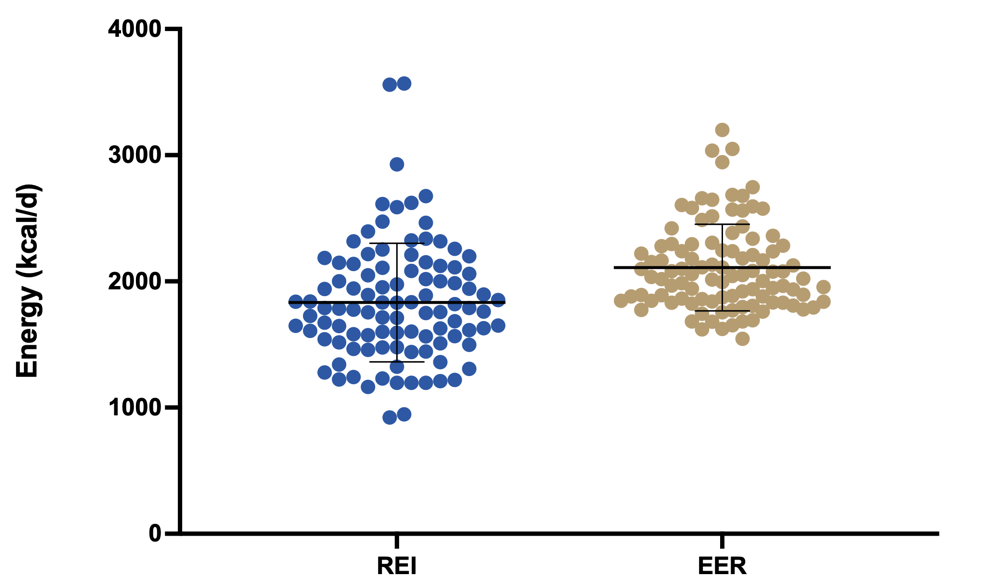


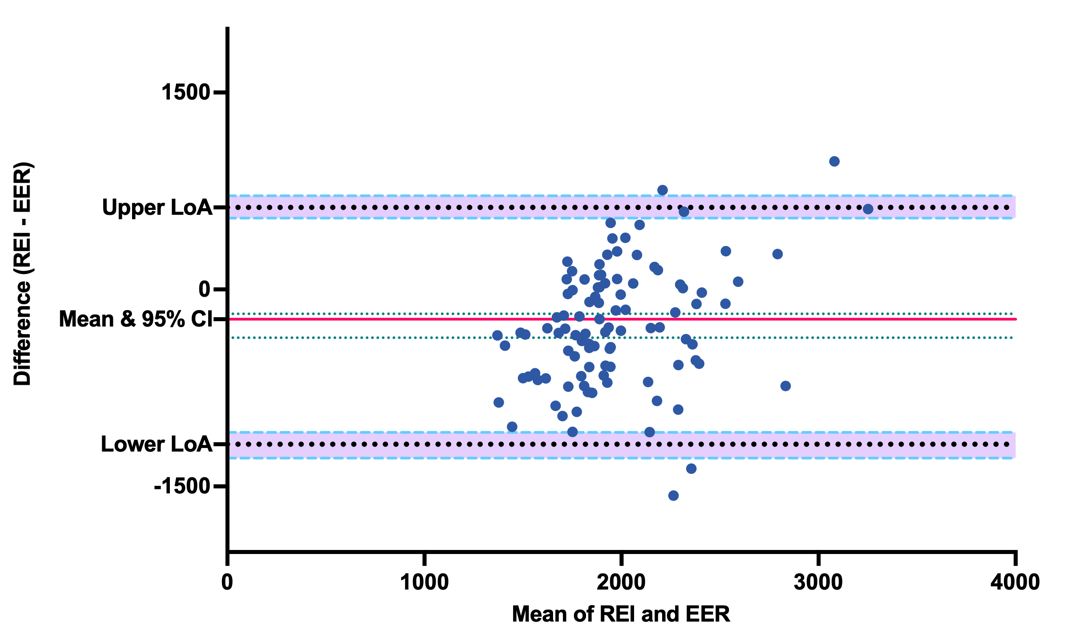


**Figure: S1)** Mean, standard deviation, and plotted individual values for reported energy intake compared to estimated energy requirements, and **S2)** Bland-Altman plot of TEF values calculated above the baseline fasting RMR measure and above the pre-meal RMR measure for paired measurements of meals. Left y-axis represents the difference of self-reported energy intake [REI] minus estimated energy requirements [EER]. The x-axis represents the mean of the paired values. Data are presented as the mean of the difference (red solid line) and 95% confidence intervals of the mean difference (green dashed lines), and Limits of Agreement (LoA; black dashed lines) with 95% confidence intervals of the upper and lower LoA (dashed sky-blue lines) shaded in purple. *p* < 0.001 for the difference between measures (paired one-sample *t*-test). Lower LoA = -1179 (95% CI, -1296 to -1098); Upper LoA = 624 (95% CI, 543 to 713).

**Table S1: Bland-Altman Comparison of Self-Reported vs. Estimated Energy Intake**

|  | | | | | | | |
| --- | --- | --- | --- | --- | --- | --- | --- |
|  | **Mean** | **SD** | **SE** | **Min** | **Max** | **Lower 95% CI** | **Upper 95% CI** |
| REI | 1833 | 470.1 | 46.78 | 922.4 | 3569 | 1740 | 1926 |
| EER | 2110 | 343.3 | 34.17 | 1546 | 3200 | 2043 | 2178 |
| REI-EER | -277 | 460.1 | 45.79 | -975 | 1570 | -368 | -186 |

**Note:** Values for energy intake are presented as kilocalories [kcal]. REI = reported energy intake; EER = estimated energy requirements (estimated resting metabolic rate [RMR] from height, weight, and reported physical activity levels multiplied by physical activity levels [PAL]).

**Figure S3 & S4: Distribution of Social Jetlag & Chronotype**


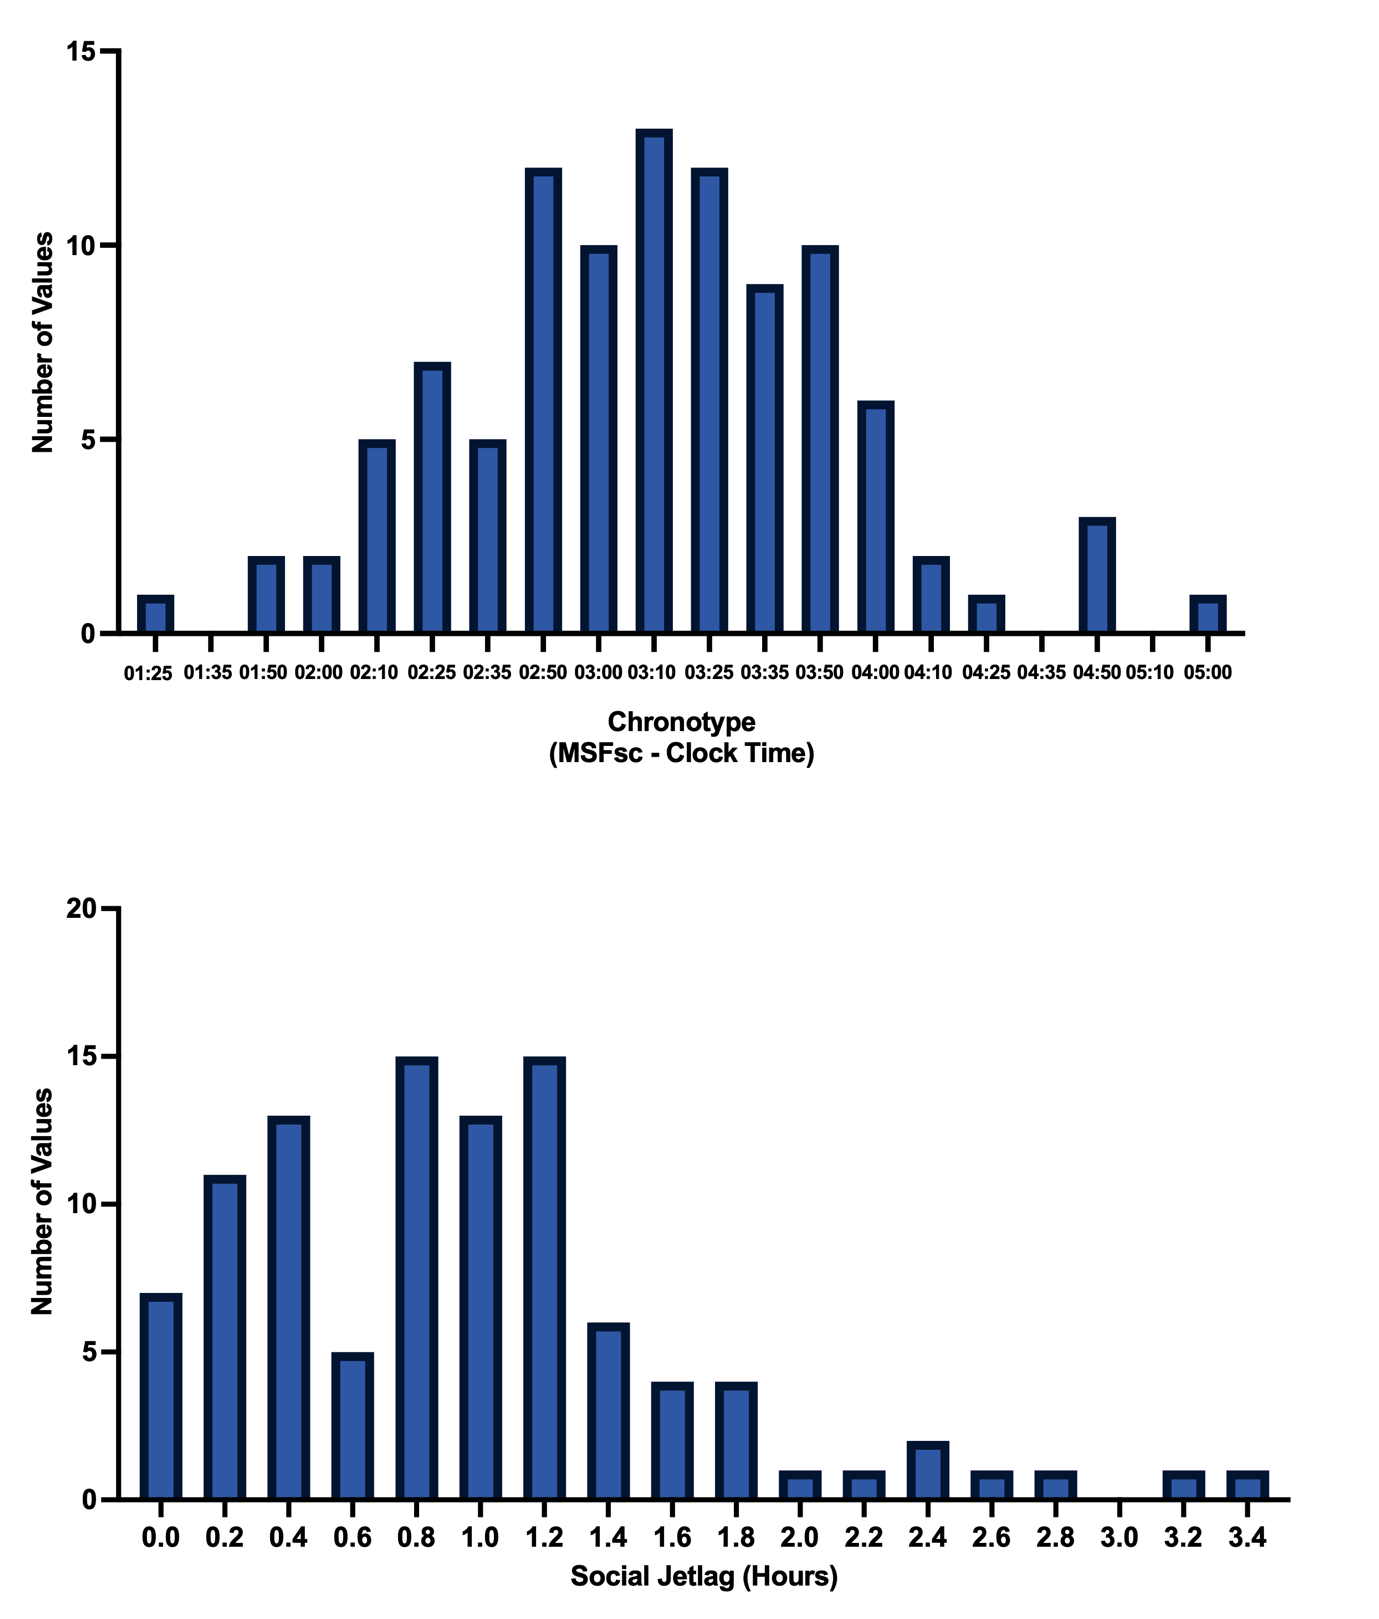


**Figure:** Histograms of distribution of **S3)** chronotype and **S4)** social jetlag in the study cohort.

**Table S2: Parameter Estimates from Linear Mixed Model Analysis of Social Jetlag Categorised in Tertile Ranges (Model 3)**

| **Tertile Model Weekdays** | | | **Tertile Model Weekends** | | |
| --- | --- | --- | --- | --- | --- |
| *Predictors* | *Estimates* | *CI* | *p* | *Estimates* | *CI* | *p* |
| (Intercept) | 89.60 | 9.87 – 169.33 | **0.028** | 57.07 | -46.21 – 160.36 | 0.279 |
| Age Centred | -0.54 | -4.17 – 3.10 | 0.772 | 0.48 | -3.43 – 4.38 | 0.811 |
| Sex [M] | 23.96 | -90.88 – 138.80 | 0.683 | 136.55 | -28.14 – 301.24 | 0.104 |
| BMI Centred | 0.01 | -5.54 – 5.56 | 0.997 | 4.93 | -1.03 – 10.89 | 0.105 |
| Workplace [Mixed] | -51.61 | -106.99 – 3.77 | 0.068 | 0.07 | -59.41 – 59.54 | 0.998 |
| Workplace [WFH] | -42.02 | -83.19 – -0.86 | **0.045** | -1.91 | -46.12 – 42.30 | 0.933 |
| SJL Quartile [Moderate] | 72.07 | 0.62 – 143.51 | **0.048** | -4.72 | -107.93 – 98.49 | 0.928 |
| SJL Quartile [High] | -2.87 | -88.72 – 82.97 | 0.948 | 25.67 | -97.50 – 148.83 | 0.683 |
| Chronotype [Intermediate] | -9.03 | -49.25 – 31.20 | 0.660 | -11.53 | -54.74 – 31.67 | 0.601 |
| Chronotype [Late] | 12.41 | -48.92 – 73.74 | 0.692 | 25.65 | -40.22 – 91.52 | 0.445 |
| Time [b] | 291.68 | 223.97 – 359.40 | **<0.001** | 346.59 | 229.85 – 463.32 | **<0.001** |
| Time [c] | 465.44 | 397.72 – 533.15 | **<0.001** | 465.36 | 348.62 – 582.09 | **<0.001** |
| Time [d] | 423.59 | 355.87 – 491.30 | **<0.001** | 554.00 | 437.26 – 670.74 | **<0.001** |
| Time [e] | 200.82 | 133.11 – 268.54 | **<0.001** | 254.43 | 137.70 – 371.17 | **<0.001** |
| Parent [Yes] | -17.68 | -73.72 – 38.37 | 0.536 | -44.10 | -104.29 – 16.08 | 0.151 |
| Smoking [Never] | 10.10 | -47.93 – 68.14 | 0.733 | -3.12 | -65.44 – 59.21 | 0.922 |
| Alcohol Centred | 4.96 | 0.21 – 9.72 | **0.041** | 8.58 | 3.47 – 13.69 | **0.001** |
| SJL Quartile [Moderate] × Time [b] | -83.13 | -164.06 – -2.19 | **0.044** | 23.86 | -115.67 – 163.38 | 0.737 |
| SJL Quartile [High] × Time [b] | -63.13 | -158.90 – 32.63 | 0.196 | -124.30 | -289.39 – 40.79 | 0.140 |
| SJL Quartile [Moderate] × Time [c] | -119.21 | -200.14 – -38.27 | **0.004** | -54.57 | -194.10 – 84.95 | 0.443 |
| SJL Quartile [High] × Time [c] | -41.40 | -137.17 – 54.36 | 0.397 | 18.07 | -147.02 – 183.16 | 0.830 |
| SJL Quartile [Moderate] × Time [d] | -79.60 | -160.54 – 1.34 | 0.054 | -9.93 | -149.46 – 129.60 | 0.889 |
| SJL Quartile [High] × Time [d] | -30.87 | -126.63 – 64.90 | 0.527 | -13.47 | -178.56 – 151.62 | 0.873 |
| SJL Quartile [Moderate] × Time [e] | -82.15 | -163.09 – -1.22 | **0.047** | -31.17 | -170.69 – 108.36 | 0.661 |
| SJL Quartile [High] × Time [e] | 103.82 | 8.06 – 199.59 | **0.034** | -12.92 | -178.01 – 152.17 | 0.878 |
| Sex [M] × SJL Quartile [Moderate] | 52.06 | -96.98 – 201.11 | 0.493 | -103.21 | -318.78 – 112.35 | 0.348 |
| Sex [M] × SJL Quartile [High] | 13.79 | -144.35 – 171.93 | 0.864 | -155.19 | -382.34 – 71.96 | 0.180 |
| Sex [M] × Time [b] | 19.23 | -108.75 – 147.20 | 0.768 | -12.67 | -233.28 – 207.93 | 0.910 |
| Sex [M] × Time [c] | 49.52 | -78.45 – 177.49 | 0.448 | 5.31 | -215.30 – 225.92 | 0.962 |
| Sex [M] × Time [d] | 262.50 | 134.53 – 390.47 | **<0.001** | 172.89 | -47.72 – 393.50 | 0.124 |
| Sex [M] × Time [e] | -18.37 | -146.34 – 109.60 | 0.778 | -169.58 | -390.19 – 51.02 | 0.132 |
| (Sex [M] × SJL Quartile [Moderate]) × Time [b] | -136.61 | -305.90 – 32.68 | 0.114 | 73.64 | -218.20 – 365.48 | 0.621 |
| (Sex [M] × SJL Quartile [High]) × Time [b] | 186.77 | 9.91 – 363.63 | **0.038** | 200.62 | -104.27 – 505.51 | 0.197 |
| (Sex [M] × SJL Quartile [Moderate]) × Time [c] | -4.82 | -174.11 – 164.47 | 0.955 | 144.04 | -147.80 – 435.88 | 0.333 |
| (Sex [M] × SJL Quartile [High]) × Time [c] | -95.57 | -272.43 – 81.29 | 0.289 | -112.67 | -417.55 – 192.22 | 0.469 |
| (Sex [M] × SJL Quartile [Moderate]) × Time [d] | -180.90 | -350.19 – -11.60 | **0.036** | -44.42 | -336.25 – 247.42 | 0.765 |
| (Sex [M] × SJL Quartile [High]) × Time [d] | 59.52 | -117.34 – 236.38 | 0.509 | 6.34 | -298.55 – 311.23 | 0.967 |
| (Sex [M] × SJL Quartile [Moderate]) × Time [e] | 122.10 | -47.19 – 291.39 | 0.157 | 410.04 | 118.20 – 701.87 | **0.006** |
| (Sex [M] × SJL Quartile [High]) × Time [e] | -21.87 | -198.73 – 154.99 | 0.808 | 292.95 | -11.94 – 597.83 | 0.060 |
| **Random Effects** | | | | | | |
| σ2 | 107379.53 | | | 127549.79 | | |
| τ00 | 5618.14 Participant | | | 2572.70 Participant | | |
| ICC | 0.05 | | | 0.02 | | |
| N | 101 Participant | | | 101 Participant | | |
| Observations | 5050 | | | 2020 | | |
| Marginal R2 / Conditional R2 | 0.207 / 0.246 | | | 0.257 / 0.272 | | |

**
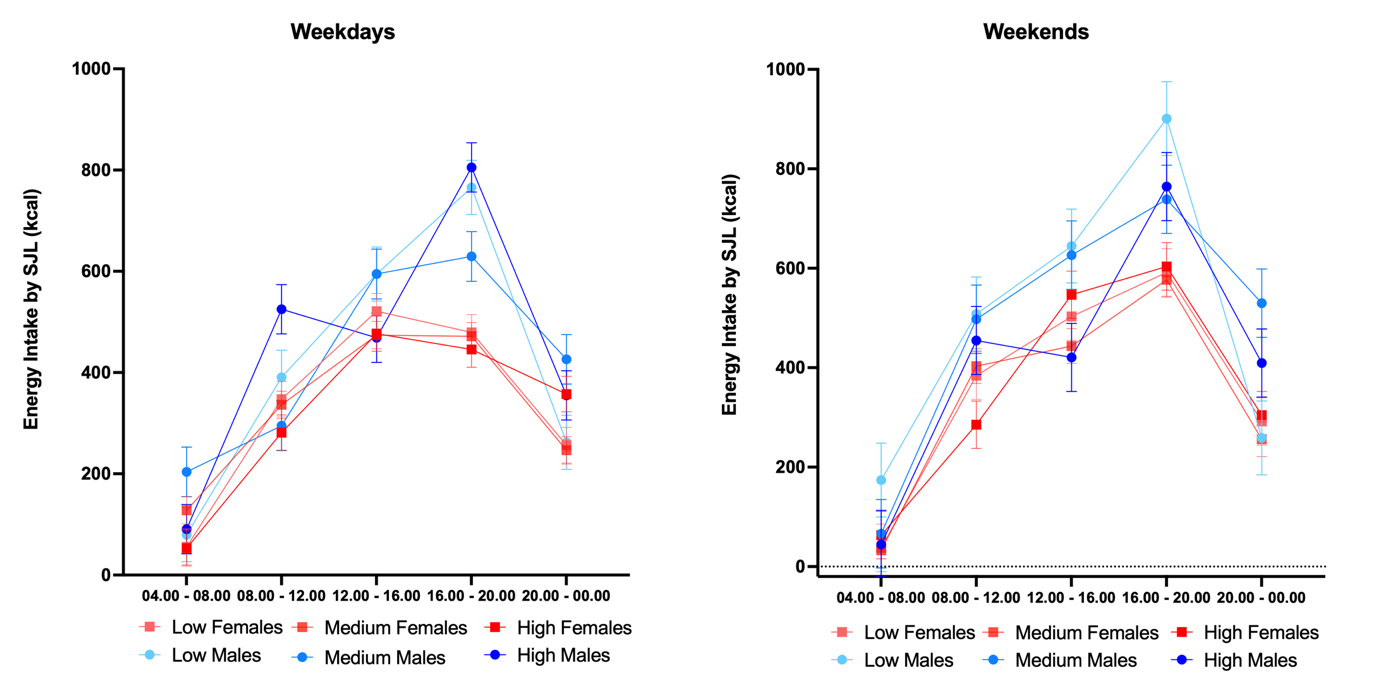
**

**Figure S5**: Model 3 estimated marginal means for energy intake (Kilocalories [kcal]) per low (< 27 min), moderate (27–75 mins), and high (> 75 mins) social jetlag (SJL) in male (**blue**) and female (**red**) participants on weekdays and weekends. Marginal means were calculated for females and males with average sample age and BMI; see Methods for further reference values.

**Table S3: Sensitivity Analysis Omitting Chronotype from Linear Mixed Model Analysis Predicting Energy Intake Based on <1 h vs. >1 h Social Jetlag (Model 1)**

| **Sensitivity – Chronotype Omitted Weekdays** | | | **Chronotype Omitted Weekends** | | |
| --- | --- | --- | --- | --- | --- |
| *Predictors* | *Estimates* | *CI* | *p* | *Estimates* | *CI* | *p* |
| (Intercept) | 174.42 | 124.74 – 224.11 | **<0.001** | 62.45 | -3.50 – 128.40 | 0.063 |
| Age Centred | -0.96 | -4.55 – 2.63 | 0.601 | 0.17 | -3.74 – 4.07 | 0.933 |
| Sex [M] | 21.43 | -60.89 – 103.75 | 0.610 | 101.45 | -16.70 – 219.59 | 0.092 |
| BMI Centred | 0.49 | -4.78 – 5.77 | 0.855 | 4.82 | -0.92 – 10.55 | 0.100 |
| Workplace [Mixed] | -46.33 | -100.16 – 7.51 | 0.092 | 2.92 | -55.61 – 61.45 | 0.922 |
| Workplace [WFH] | -43.04 | -81.90 – -4.18 | **0.030** | -2.01 | -44.26 – 40.23 | 0.926 |
| SJL [> 1 h] | -81.30 | -140.01 – -22.58 | **0.007** | -10.97 | -95.20 – 73.25 | 0.798 |
| Time [b] | 209.01 | 163.98 – 254.04 | **<0.001** | 373.25 | 295.94 – 450.56 | **<0.001** |
| Time [c] | 361.53 | 316.50 – 406.56 | **<0.001** | 464.88 | 387.57 – 542.19 | **<0.001** |
| Time [d] | 368.27 | 323.24 – 413.30 | **<0.001** | 549.81 | 472.50 – 627.12 | **<0.001** |
| Time [e] | 94.09 | 49.06 – 139.12 | **<0.001** | 193.20 | 115.89 – 270.51 | **<0.001** |
| Parent [Yes] | -20.74 | -76.68 – 35.20 | 0.467 | -56.55 | -117.35 – 4.26 | 0.068 |
| Smoking [Ex] | -2.97 | -59.42 – 53.49 | 0.918 | 11.17 | -50.21 – 72.54 | 0.721 |
| Alcohol Centred | 5.23 | 0.66 – 9.80 | **0.025** | 7.85 | 2.88 – 12.82 | **0.002** |
| Sex [M] × Time [b] | 27.02 | -64.75 – 118.79 | 0.564 | -21.10 | -178.67 – 136.47 | 0.793 |
| Sex [M] × Time [c] | 70.17 | -21.61 – 161.94 | 0.134 | 61.30 | -96.27 – 218.86 | 0.446 |
| Sex [M] × Time [d] | 196.27 | 104.50 – 288.04 | **<0.001** | 87.92 | -69.64 – 245.49 | 0.274 |
| Sex [M] × Time [e] | 99.07 | 7.30 – 190.84 | **0.034** | 43.77 | -113.79 – 201.34 | 0.586 |
| Sex [M] × SJL [> 1 h] | 16.27 | -104.75 – 137.28 | 0.792 | -113.95 | -289.20 – 61.31 | 0.202 |
| SJL [> 1 h] × Time [b] | 49.20 | -16.17 – 114.58 | 0.140 | -89.59 | -201.84 – 22.66 | 0.118 |
| SJL [> 1 h] × Time [c] | 63.59 | -1.79 – 128.97 | 0.057 | -52.15 | -164.40 – 60.10 | 0.362 |
| SJL [> 1 h] × Time [d] | 11.25 | -54.13 – 76.62 | 0.736 | -8.99 | -121.24 – 103.26 | 0.875 |
| SJL [> 1 h] × Time [e] | 182.26 | 116.88 – 247.64 | **<0.001** | 87.42 | -24.83 – 199.67 | 0.127 |
| (Sex [M] × SJL [> 1 h]) × Time [b] | 46.13 | -91.64 – 183.91 | 0.512 | 186.70 | -49.85 – 423.25 | 0.122 |
| (Sex [M] × SJL [> 1 h]) × Time [c] | -80.89 | -218.67 – 56.89 | 0.250 | -79.62 | -316.16 – 156.93 | 0.509 |
| (Sex [M] × SJL [> 1 h]) × Time [d] | 82.84 | -54.93 – 220.62 | 0.239 | 164.87 | -71.68 – 401.42 | 0.172 |
| (Sex [M] × SJL [> 1 h]) × Time [e] | -109.37 | -247.15 – 28.40 | 0.120 | 89.80 | -146.75 – 326.35 | 0.457 |
| **Random Effects** | | | | | | |
| σ2 | 108150.53 | | | 127428.86 | | |
| τ00 | 5254.84 Participant | | | 2387.83 Participant | | |
| ICC | 0.05 | | | 0.02 | | |
| N | 101 Participant | | | 101 Participant | | |
| Observations | 5050 | | | 2020 | | |
| Marginal R2 / Conditional R2 | 0.201 / 0.238 | | | 0.255 / 0.269 | | |
